# Supplementary material for: Smart capsule for non-invasive sampling and studying of the gastrointestinal microbiome
Source: Royal Society of Chemistry journal article supplement (doi:10.1039/c9ra10986b), 2020-01-01
Supplement: c9ra10986b1.pdf [file c9ra10986b1.pdf]

## Supporting information

### Smart Capsule for Non-invasive Sampling and Studying of the Gastrointestinal Microbiome

Jose Fernando Waimin<sup>†ab</sup>, Sina Nejati<sup>†ab</sup>, Hongjie Jiang<sup>bc</sup>, Jake Qiu<sup>bd</sup>, Jianghai Wang<sup>bd</sup>, Mohit S. Verma<sup>bde</sup>, Rahim Rahimi<sup>abc\*</sup>

<sup>a</sup> School of Materials Engineering, Purdue University, West Lafayette, Indiana, 47907, USA. E-mail: rrahimi@purdue.edu

<sup>b</sup> Birck Nanotechnology Center, Purdue University, West Lafayette, IN 47907.

<sup>c</sup> School of Electrical Engineering, Purdue University, West Lafayette, Indiana, 47907, USA.

<sup>d</sup> Department of Agricultural and Biological Engineering, Purdue University, West Lafayette, IN 47907, USA

<sup>e</sup> Weldon School of Biomedical Engineering, Purdue University, West Lafayette, Indiana, 47907, USA.

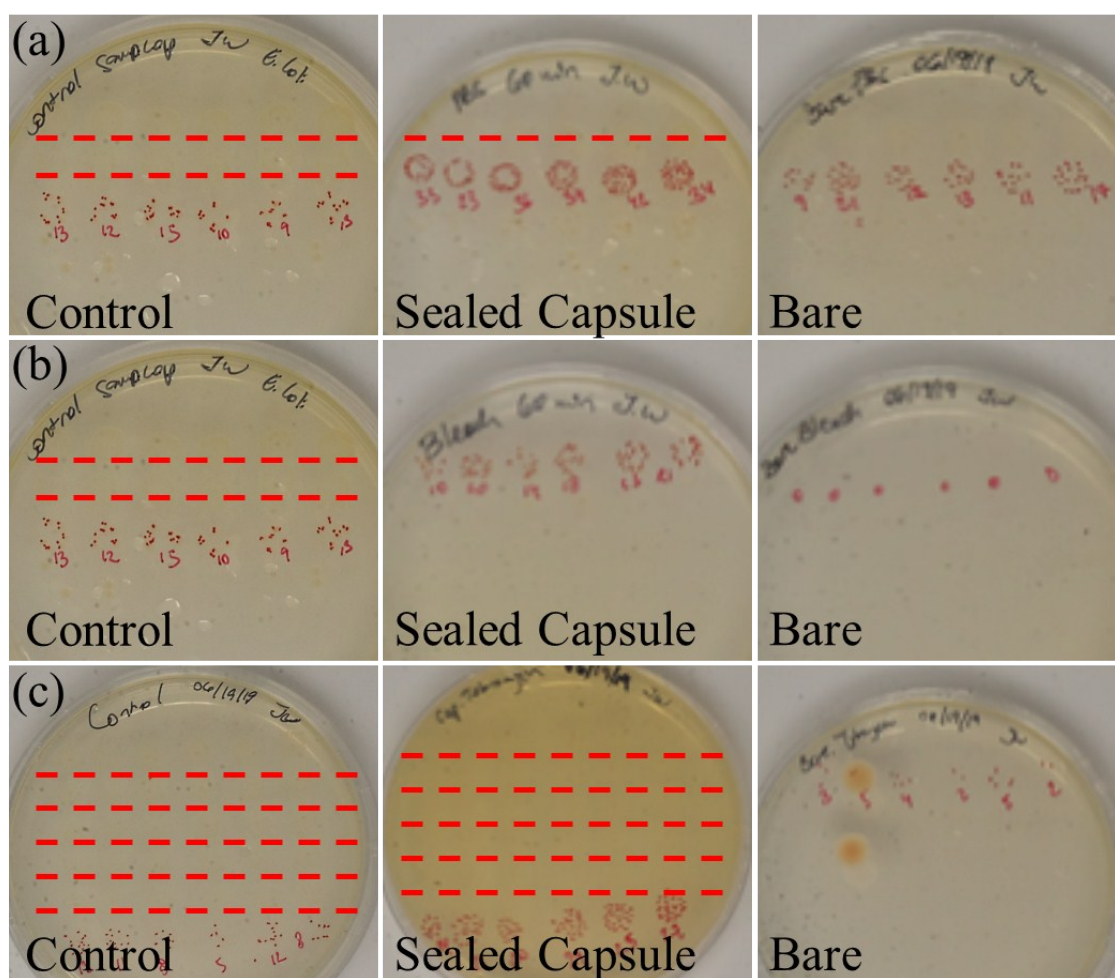

**Fig. S1.** Images of TSB/agar plates used for culture of *E. coli* samples captured by bare hydrogels and hydrogels within fully assembled sealed capsules after exposure to solutions of (a) PBS, (b) bleach, and (c) Tobramycin.

Bacteria captured with bare hydrogels and hydrogels within fully assembled sealed capsules were cultured following standard procedures. The viable bacterial count of samples exposed to PBS, Tobramycin, and bleach in both conditions was determined via Colony Forming Unit (CFU) counting and reported in CFU/mL, as seen in **Fig. 10** of the manuscript. **Fig. S1** shows pictures of the actual TSB/agar plates used for CFU counting procedures. The same control was used to inoculate bacterial stock solutions for experiments involving exposure to solutions of PBS (**Fig. S1a**) and bleach (**Fig. S1b**), hence the similarity between control plate. A different, more mature, stock was used for the added experiment involving exposure to a solution of Tobramycin (**Fig. S1c**). Across all conditions, there is an obvious decrease in viable bacterial counts from bacteria sampled with bare hydrogels compared to bacteria sampled with hydrogels within sealed capsules.

In order to demonstrate the adequacy of the proposed hydrogel in sampling different bacterial strains, we designed an experiment using three different bacteria grown in both aerobic and anaerobic conditions. The bacteria used in this experiment are *Escherichia coli*, *Staphylococcus aureus*, and *Lactobacillus casei*. *E. coli* is a gram-negative bacterium commonly found in the gut and in stool [1]. *S. aureus* is a gram-positive bacterium which can cause infections in the gut and is commonly found in infants [2]–[4]. *L. casei* is a gram-positive bacterium, also commonly found in the gut and often used as a probiotic due to its positive impact on the gut microbial flora [5], [6]. All of these bacteria are facultative anaerobes, as they can proliferate in both aerobic and anaerobic environments. Tryptic Soy Broth (TSB), Brain Heart Infusion (BHI), and De Man, Rogosa and Sharpe (MRS) were used as culture media for *E. coli*, *S. aureus*, and *L. casei* respectively. Growth in aerobic conditions was achieved by growing bacteria in their respective media in an anaerobic chamber at 37 °C overnight. Growth in anaerobic conditions was achieved by growing bacteria in their respective media in an anaerobic chamber at 37 °C overnight. All subsequent hydrogel exposure and CFU plating was performed in the respective chambers. In order to sample the bacteria with the hydrogel, 1 mL of the bacterial stock was added to a 1.5 mL centrifuge tube containing a dried hydrogel. Hydrogels were allowed to swell for three hours before extraction. Hydrogels were then immersed into 100% PBS solutions for extraction of the sampled material. The total sampled volume was estimated to be close to 250  $\mu$ L by measuring the decrease in volume after 3 hours of swelling. To serve as a control, 250  $\mu$ L of stock solutions were directly inoculated into 100% PBS. Both solutions containing the hydrogel and control were allowed to shake in a rocking platform for 15 minutes. The resulting concentration of viable bacteria counts was quantified via CFU counting.

Results from **Fig. S2** show the number of viable bacteria sampled with a hydrogel compared to the control. In bacterial samples cultivated in aerobic conditions (**Fig. S2a**), sampling with the hydrogel resulted in no loss of viable bacteria in the case of *E. coli*, a 1-log reduction in viable *S. aureus* sampled, and a 1-log reduction in *L. casei* sampled. In bacterial samples cultivated in anaerobic conditions (**Fig. S2b**), a 1-log reduction in viable bacteria was observed across all three strains. The reason for a 1-log reduction across almost all bacterial strains and conditions could be attributed to an overestimation of the total amount of fluid sampled with the hydrogel or due to a loss of viable bacteria due to strong attachment to the hydrogel surface. Nonetheless, these results

show high affinity of different bacterial strains to the hydrogel matrix used in the sampling capsule and suggest that the hydrogel is a more than adequate sampling agent for bacteria found in the gut.

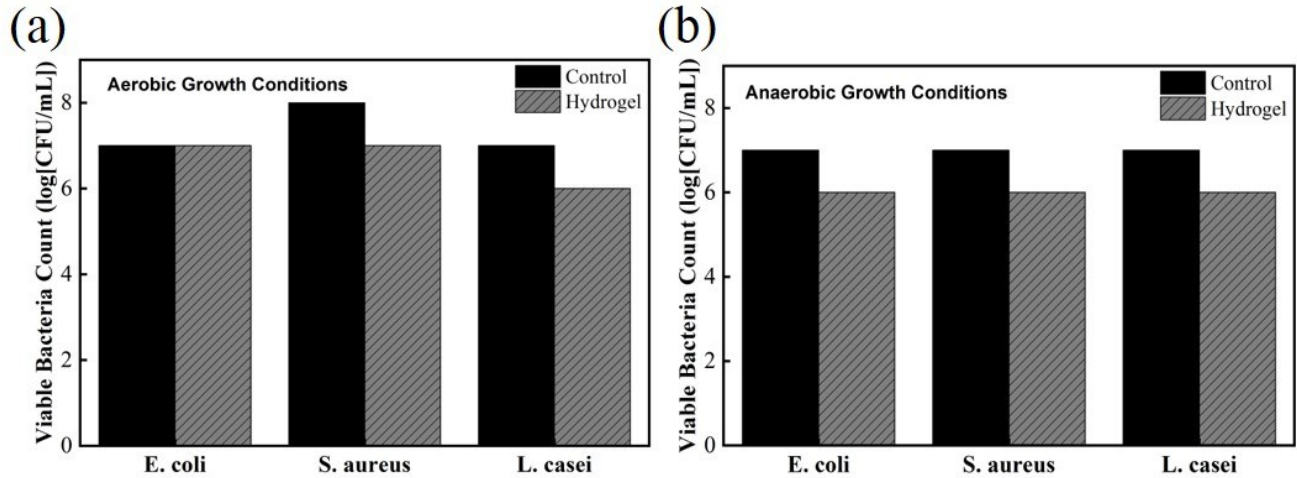

**Fig. S2.** Total number of viable bacteria counts in log[CFU/mL] of *E. coli*, *S. aureus*, and *L. casei* sampled using a hydrogel cultivated in both (a) aerobic and (b) anaerobic conditions. Direct inoculation using 250  $\mu$ L of stock solution was used as control.

Furthermore, the positive results in anaerobic conditions suggest that there should be no loss due to changes in growth conditions from aerobic to anaerobic (gut) conditions.

## References

- [1] J. Y. Lim, J. W. Yoon, and C. J. Hovde, "A brief overview of *Escherichia coli* O157:H7 and its plasmid O157," *Journal of Microbiology and Biotechnology*, vol. 20, no. 1, pp. 1–10, 2010.
- [2] S. Vesterlund, M. Karp, S. Salminen, and A. C. Ouwehand, "Staphylococcus aureus adheres to human intestinal mucus but can be displaced by certain lactic acid bacteria," *Microbiology*, vol. 152, no. 6, pp. 1819–1826, 2006.
- [3] E. Lindberg *et al.*, "Effect of lifestyle factors on *Staphylococcus aureus* gut colonization in Swedish and Italian infants," *Clin. Microbiol. Infect.*, vol. 17, no. 8, pp. 1209–1215, 2011.
- [4] F. L. Nowrouzian *et al.*, "Superantigens and adhesins of infant gut commensal *Staphylococcus aureus* strains and association with subsequent development of atopic eczema," *Br. J. Dermatol.*, vol. 176, no. 2, pp. 439–445, 2017.
- [5] M. Hickson *et al.*, "Use of probiotic *Lactobacillus* preparation to prevent diarrhoea associated with antibiotics: Randomised double blind placebo controlled trial," *Br. Med. J.*, vol. 335, no. 7610, pp. 80–83, 2007.
- [6] B. Alipour *et al.*, "Effects of *Lactobacillus casei* supplementation on disease activity and inflammatory cytokines in rheumatoid arthritis patients: A randomized double-blind clinical trial," *Int. J. Rheum. Dis.*, vol. 17, no. 5, pp. 519–527, 2014.
